# Supplementary material for: Prospective analysis of neutralising antibody titres in secondary non-responders under continuous treatment with a botulinumtoxin type A preparation free of complexing proteins—a single cohort 4-year follow-up study
Source: PubMed Central journal article supplement — BMJ Open. 2012 Aug 3;2(4):e000646. doi: 10.1136/bmjopen-2011-000646 (PMC3449271; doi:10.1136/bmjopen-2011-000646), 2012-08-03
Supplement: bmjopen-2011-000646.draft_revisions.pdf [file bmjopen-2011-000646.draft_revisions.pdf]

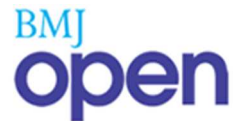

**Prospective analysis of neutralising antibody titres in secondary non-responders under continuous treatment with a botulinumtoxin type A preparation free of complexing proteins – a single cohort 4-year follow-up study**

|                                 |                                                                                                                                              |
|---------------------------------|----------------------------------------------------------------------------------------------------------------------------------------------|
| Journal:                        | <i>BMJ Open</i>                                                                                                                              |
| Manuscript ID:                  | bmjopen-2011-000646.R3                                                                                                                       |
| Article Type:                   | Research                                                                                                                                     |
| Date Submitted by the Author:   | 14-Jun-2012                                                                                                                                  |
| Complete List of Authors:       | Hefter, Harald<br>Hartmann, Christian<br>Kahlen, Ulrike<br>Moll, Marek<br>Bigalke, Hans                                                      |
| <b>Primary Subject Heading</b>: | Neurology                                                                                                                                    |
| Secondary Subject Heading:      | Medical management, Pharmacology and therapeutics                                                                                            |
| Keywords:                       | secondary non-responder , cervical dystonia , cessation of therapy , neutralising antibody titre, complexing proteins , botulinum neurotoxin |
|                                 |                                                                                                                                              |

SCHOLARONE™  
Manuscripts

1  
2  
3 **Prospective analysis of neutralising antibody titres in secondary non-responders**  
4 **under continuous treatment with a botulinumtoxin type A preparation free of**  
5 **complexing proteins – a single cohort 4-year follow-up study**  
6  
7  
8  
9

10  
11 Harald Hefter<sup>1</sup>, Christian Hartmann<sup>1</sup>, Ulrike Kahlen<sup>1</sup>, Marek Moll<sup>1</sup>, Hans Bigalke<sup>2</sup>

12  
13  
14 <sup>1</sup> Department of Neurology, University of Düsseldorf, Moorenstrasse 5, Düsseldorf, Germany

15  
16 <sup>2</sup> Institute of Toxicology, Medical School Hannover, Hannover, Germany  
17  
18  
19

20 Corresponding author

21  
22 Harald Hefter

23  
24 Department of Neurology, University of Düsseldorf

25  
26 Moorenstrasse 5, D-40225 Düsseldorf, Germany

27  
28 Email: harald.hefter@online.de

29  
30  
31 Tel: +49 211 811 7025

32  
33  
34 Fax: +49 211 811 4903  
35  
36  
37

38 I Harald Hefter the Corresponding Author of this article contained within the original  
39 manuscript which includes any diagrams & photographs, other illustrative material, video,  
40 film or any other material howsoever submitted by the Contributor(s) at any time and related  
41 to the Contribution (“the Contribution”) have the right to grant on behalf of all authors and do  
42 grant on behalf of all authors, a licence to the BMJ Publishing Group Ltd and its licensees, to  
43 permit this Contribution (if accepted) to be published in BMJ Open and any other BMJ Group  
44 products and to exploit all subsidiary rights, as set out in the licence at:  
45  
46  
47  
48  
49  
50  
51  
52

53 ([http://group.bmj.com/products/journals/instructions-for-authors/BMJOpen\\_licence.pdf](http://group.bmj.com/products/journals/instructions-for-authors/BMJOpen_licence.pdf))  
54  
55  
56  
57  
58  
59  
60

1  
2  
3 **Word count (text):** 1807  
4

5 **Word count (abstract):** 296  
6

7 **Tables/Figures:** 0/2  
8

9 **References:** 18  
10

11 **Short title:** Low antigenicity of incobotulinumtoxinA  
12  
13  
14  
15  
16  
17  
18  
19  
20  
21  
22  
23  
24  
25  
26  
27  
28  
29  
30  
31  
32  
33  
34  
35  
36  
37  
38  
39  
40  
41  
42  
43  
44  
45  
46  
47  
48  
49  
50  
51  
52  
53  
54  
55  
56  
57  
58  
59  
60

For peer review only

**ABSTRACT**

**Objective.** In long-term botulinum neurotoxin treatment, loss of therapeutic efficacy may occur due to neutralising antibody formation. Preliminary results with incobotulinumtoxinA, a preparation free of complexing / accessory proteins, have indicated a low antigenicity. We hypothesised that continuous treatment with this botulinum neurotoxin preparation would not result in an increase in neutralising antibody titres (NABTs) in patients with preexisting NABTs.

**Design.** Prospective, blinded cohort study.

**Setting.** Single centre in Germany.

**Participants.** Thirty-seven cervical dystonia patients with NABTs and partial secondary non-responsiveness to their previous botulinum neurotoxin type A treatment.

**Intervention.** 3-monthly intramuscular injections of incobotulinumtoxinA with a constant dose of 200 MU per injection during the first year; thereafter up to 500 MU for the next 36 months.

**Outcome measures.** Primary outcome measure: number of patients in whom NABTs declined below the initial titre after 48 months of incobotulinumtoxinA treatment or in whom titres had become negative within the 48 months. Secondary outcome measure: steepness of changes in NABT. NABTs were determined by mouse hemidiaphragm assay. Findings were compared to long-term data from 24 cervical dystonia patients who had developed NABTs and in whom treatment had been discontinued.

**Results.** Following a transient increase in the first 24 months under incobotulinumtoxinA treatment in some patients, NABTs declined well below the initial titre in the majority of patients. Test assay results were negative in most of the patients followed for more than 36 months. NABTs seemed to decline into the negative detection range as rapidly under incobotulinumtoxinA treatment as after cessation of botulinum neurotoxin therapy.

1  
2  
3 **Conclusions.** The reduction of neutralising antibody titres despite continuous treatment with  
4 incobotulinumtoxinA indicates low antigenicity of incobotulinumtoxinA. This might have  
5 implications on restrictions such as minimum injection intervals of  $\geq 10$  weeks currently in  
6 place for maintaining successful long-term application of botulinum neurotoxin.  
7  
8  
9  
10

11  
12  
13  
14 **Key words:** secondary non-responder - cervical dystonia - cessation of therapy - neutralising  
15 antibody titre - complexing proteins – botulinum neurotoxin  
16  
17  
18  
19  
20  
21  
22  
23  
24  
25  
26  
27  
28  
29  
30  
31  
32  
33  
34  
35  
36  
37  
38  
39  
40  
41  
42  
43  
44  
45  
46  
47  
48  
49  
50  
51  
52  
53  
54  
55  
56  
57  
58  
59  
60

## ARTICLE SUMMARY

### Article focus

- Evaluation of antigenicity of incobotulinumtoxinA, a botulinum neurotoxin type A preparation free of complexing proteins for the treatment of cervical dystonia.

### Key messages

- Secondary non-responders to conventional type A preparations showed a decline in neutralising antibody titres despite continuous treatment with incobotulinumtoxinA over a period of up to 50 months.
- Neutralising antibody titres seemed to decline into the negative detection range as rapidly under incobotulinumtoxinA treatment as after cessation of botulinumtoxin therapy.
- These results indicate low antigenicity of incobotulinumtoxinA.

### Strengths and limitations of this study

- Up to date this study is the largest investigation of secondary non-responders with neutralising antibodies against botulinumtoxinA.
- The continuous treatment with incobotulinumtoxinA in secondary non-responders according to current knowledge of immunogenicity of botulinumtoxins should have resulted in boosting of antibody titres. Instead an unexpected decline of antibody titres was observed.
- This is an interesting finding despite the small sample size (n=37). Monocentric data have to be confirmed in multicentre studies.

## INTRODUCTION

Intramuscular injections of botulinum neurotoxin (BoNT) have become the treatment of choice for the symptomatic treatment of focal dystonias;<sup>1</sup> a recent evidence-based assessment gave a Level A recommendation for the treatment of cervical dystonia (CD).<sup>2</sup> Therapeutic BoNT type A (BoNT/A) preparations usually consist of a high molecular weight complex containing the biologically active 150 kDa neurotoxin, non-toxic complexing / accessory proteins, and excipients.<sup>3</sup> Repeated BoNT injections can trigger an immune response and can result in the formation of neutralising antibodies against the botulinum neurotoxin which might lead to non-responsiveness to treatment.<sup>4</sup> To minimise this loss of therapeutic effect, it is recommended to avoid risk factors such as booster injections, the use of high doses, and short intervals of less than 10 to 12 weeks between injections.<sup>5</sup> Thus, optimal BoNT injection management leads to therapy restrictions in order to avoid secondary non-response.

Current treatment recommendations reduce the frequency of secondary non-response to approx. 2% over a treatment period of 2 years in patients with cervical dystonia.<sup>6</sup> However, a considerable percentage of patients would prefer shorter injection intervals and more individualised treatment.<sup>7</sup> There is thus still a need for a BoNT preparation with an extremely low antigenicity to avoid therapy restrictions and meet patients' needs. The new BoNT/A preparation free of complexing proteins seems to be such a candidate.

IncobotulinumtoxinA (Xeomin®, NT 201, Merz Pharmaceuticals GmbH, Germany) treatment has not only been proven efficacious and well tolerated in patients with CD<sup>8-10</sup> but preliminary results also indicate a low antigenicity.<sup>3,11-13</sup> The present study was designed to support these hints of low antigenicity. We hypothesised that continuous treatment with incobotulinumtoxinA would not result in an increase in neutralising antibody titres (NABTs) in patients with preexisting NABTs. To test our hypothesis, we prospectively analysed NABTs in an immunologically critical subgroup of patients with NABTs and partial

1  
2  
3 secondary non-responsiveness who were switched from long-term treatment with other  
4  
5 botulinumtoxin A preparations to incobotulinumtoxinA treatment.  
6  
7

## 8 9 **METHODS**

10  
11 Thirty-seven adult patients suffering from idiopathic cervical dystonia (CD) partly in  
12  
13 combination with other focal or generalised dystonia had been satisfactorily treated long-term  
14  
15 with the BoNT/A preparations abobotulinumtoxinA (Dysport®, Ipsen Ltd., Slough, UK) or  
16  
17 onabotulinumtoxinA (Botox®, Allergan Inc, Irvine, USA). They were included in this  
18  
19 prospective, blinded, monocentric study 1. when clinically secondary non-responsiveness  
20  
21 with systematic worsening of the severity of cervical dystonia occurred –severity was  
22  
23 measured by means of the objective TSUI score<sup>14</sup> (12 weeks after injection) at three  
24  
25 consecutive injection visits over a period of at least 6 months despite increased BoNT/A  
26  
27 doses– and 2. when patients had given their informed consent to be switched to  
28  
29 incobotulinumtoxinA.  
30  
31

32  
33 IncobotulinumtoxinA was administered as intramuscular injections of 200 MU without  
34  
35 electromyography guidance every 3 months according to their previous BoNT/A injection  
36  
37 protocols. IncobotulinumtoxinA doses were kept constant during the first year; thereafter,  
38  
39 doses could be adjusted according to the patients' requirements, reduced or increased up to  
40  
41 500 MU per injection.  
42  
43

44  
45 The study was carried out according to the Declaration of Helsinki and Good Clinical  
46  
47 Practice.  
48

49  
50 Blood samples for BoNT antibody testing were collected at the start of the study and in yearly  
51  
52 intervals. Antibody titres were determined by an independent blinded contractor (Toxogen  
53  
54 GmbH, Hannover, Germany) using the sensitive mouse hemidiaphragm assay for neutralising  
55  
56 antibodies.<sup>15</sup> Base10 logarithms are presented for all titres ( $\log_{10}$  (NABT) [mU/ml]); the value  
57  
58 of -1.3 was assigned to a negative test result. The upper limit of neutralising antibody  
59  
60



1  
2  
3 detection in the mouse hemidiaphragm assay was 10 mU/mL ( $\log_{10}(10) = 1$ ), the lower limit  
4 was 0.1 mU/ml ( $(\log_{10}(0.1) = -1)$ ). The use of the logarithmic scale allows the comparison of  
5 NABTs over the broad range of titres between 10 mU/ml and 0.1 mU/ml.  
6  
7

8  
9 The primary outcome measure of the study was the number of patients in whom NABTs  
10 declined below the initial titre after 48 months of incobotulinumtoxinA treatment or who had  
11 negative titre results within the 48 months. The steepness of changes in NABT was chosen as  
12 secondary outcome measure. This parameter turned out to be difficult to calculate, because  
13 the titre had dropped below the detection limit in too many patients.  
14  
15  
16  
17  
18  
19

20  
21  
22 To test our hypothesis, the formation of neutralising antibodies in the present patient  
23 population was followed over a period of up to 50 months.  
24

25  
26 The temporal course of neutralising antibody titres (NABTs) was compared to the course of  
27 NABTs of 24 CD patients who had their BoNT treatment discontinued after development of  
28 antibody-induced treatment failure. NABTs of eight of these 24 patients have been described  
29 in the literature,<sup>16</sup> the remaining 16 are follow-up patients from our centre.  
30  
31  
32  
33  
34  
35  
36

37  
38 For quantification of the slope of NABT decline, patient data were divided into three groups.  
39 Group 1 included the titres of the 16 patients observed in our department with partial therapy  
40 failure who had their BoNT treatment discontinued. Group 2 were the NABTs of the 8  
41 patients with complete therapy failure reported in the literature<sup>16</sup> and group 3 included the  
42 titres of 37 patients with partial therapy failure who received continuous incobotulinumtoxinA  
43 treatment after positive NABTs were detected. The decline in NABTs was quantified by  
44 calculating a linear regression line through  $\log_{10}$ AB-titre values against time  
45 ( $\log_{10}(\text{mU/ml/year})$ ) for each patient. A negative titre was substituted by  $\log_{10}(0.01)$ , because  
46 0.01 is the next titre value below the detection limit of 0.01 mU/ml.  
47  
48  
49  
50  
51  
52  
53  
54  
55  
56  
57  
58  
59  
60

1  
2  
3 For group comparisons, an ANOVA was performed (Kruskal-Wallis test), for group mean  
4  
5 comparisons the non-parametric Mann-Whitney U test was used. These tests are part of the  
6  
7 commercially available statistics package SPSS.  
8  
9

## 10 11 **RESULTS**

12  
13  
14 The two figures show the temporal course of neutralising antibody titres over a period of up to  
15  
16 50 months in secondary non-responders who were either switched to incobotulinumtoxinA  
17  
18 (Figure 1), or did not receive any further BoNT treatment (Figure 2).  
19

20  
21 Antibody titre values of one of the CD patients with cessation of BoNT treatment (Figure 2)  
22  
23 were included for a visual marker in Figure 1 (symbol: black square, bold line). This patient  
24  
25 had high titres (upper limit of detection); after a slow decline over the first 30 months, the  
26  
27 neutralising antibody test was negative at the end of the 50-month observation period.  
28

29  
30 Despite a transient increase in 10 patients in the first 24 months under incobotulinumtoxinA  
31  
32 treatment (Figure 1), neutralising antibody titres declined well below the initial titre in the  
33  
34 majority of patients (31 patients, 84%,  $p < 0.001$ , chi-square test). Test assay results were even  
35  
36 negative or below the lower detection limit in 23 (62%) of the patients in the follow-up, i.e.  
37  
38 antibody titres were  $\leq 0.1$  mU/ml. In Figure 2 decline of titres is demonstrated for the patients  
39  
40 in whom therapy was stopped (light grey squares = published patients, coloured circles own  
41  
42 patients).  
43

44  
45 There was considerable inter-individual variability in the steepness of the titre decline in all  
46  
47 three patient populations (Figure 1 and 2). In most patients receiving incobotulinumtoxinA  
48  
49 treatment (Figure 1), baseline titres were lower than in the patients with discontinued  
50  
51 treatment (Figure 2). Under incobotulinumtoxinA treatment, antibody titres seemed to decline  
52  
53 into the negative detection range as rapidly as after cessation of therapy and in some cases  
54  
55 became negative even earlier than in those patients who had discontinued their BoNT/A  
56  
57 treatment, probably because of lower initial titres.  
58  
59  
60

1  
2  
3 Mean slope of NABT decline ( $-0.0516 \log_{10}(\text{mU/ml})/\text{year}$ ) was lowest in the patients with  
4  
5 partial therapy failure in whom BoNT treatment was discontinued after detection of positive  
6  
7 NABTs (group 1). Variability of slopes was also highest in this group (min:  $-0.2168$ ; max:  
8  
9  $0.0048$ ; SD:  $0.6463$ ). The NABTs reported in the literature for patients with complete  
10  
11 treatment failure (group 2) declined rather homogeneously ( $-0.0664$ ; min:  $-1.1620$ ; max:  $-$   
12  
13  $0.0348$ ; SD:  $0.2897$ ). However, the mean slope for group 2 did not differ significantly from  
14  
15 the mean slope for group 1 ( $p=0.12$ ). The steepest mean slope of NABT decline ( $-0.0750$ ) was  
16  
17 observed in group 3 (min:  $-0.9484$ ; max:  $0.1505$ ; SD:  $0.1725$ ).

18  
19  
20 The Kruskal-Wallis test did not show any significant differences of slopes of NABT decline  
21  
22 between the groups ( $p=0.269$ ). Even when groups 1 and 2 were combined and slopes of  
23  
24 patients with and without incobotulinumtoxinA treatment (group 3 vs. groups 1+2) were  
25  
26 compared, no significant difference could be detected ( $p=0.816$ ).

## 27 28 29 30 31 32 33 34 **DISCUSSION**

35  
36 IncobotulinumtoxinA is a preparation free of complexing proteins with a high specific  
37  
38 biological activity.<sup>3,17</sup>

39  
40 The patients included in our investigation had already developed secondary treatment failure  
41  
42 and neutralising antibodies under the former treatment with botulinum toxin type A  
43  
44 formulations containing complexing proteins. Despite their sensitivity to react to BoNT/A  
45  
46 treatment with antibody formation and despite a possible increase of doses up to 500 MU  
47  
48 incobotulinumtoxinA, more than 80% of these patients showed a decrease in antibody titres  
49  
50 and in more than 60% a reduction down to the detection limit was observed. The antigen load  
51  
52 of repetitive injections with 200 to 500 MU incobotulinumtoxinA every 3 months was  
53  
54 apparently so low that in this cohort of immunologically critical patients no permanent  
55  
56 boosting of antibody titres was observed. This confirms our hypothesis. We do not know  
57  
58  
59  
60

1  
2  
3 whether this occurs because the protein load of 0.88 ng to 2.2 ng (200 to 500 MU) of active  
4 neurotoxin is not detected by the human immune system after intramuscular injections or  
5 because of the lack of complexing proteins. The role of complexing proteins regarding the  
6 efficacy of treatment in secondary non-responders with BoNT/A is still unclear but deserves  
7 further interest.  
8  
9

10  
11 Since NABTs under incobotulinumtoxinA treatment declined at least as rapidly as after  
12 cessation of therapy, we recommend to detect antibody-induced therapy failure as early as  
13 possible to avoid any further increase in NABTs and development of complete treatment  
14 failure. Comparison of Figures 1 and 2 indicates the tendency that in patients with partial  
15 therapy failure (group 1 and 3) titres return to negative values earlier than in patients with  
16 complete therapy failure and higher antibody titres (group 2).  
17  
18  
19  
20  
21  
22  
23  
24  
25  
26

27 This is important for further continuation of BoNT/A treatment. It has been observed that in a  
28 patient with antibody-induced therapy failure and negative antibody titres after cessation of  
29 therapy after several years, no new formation of neutralising antibodies and clinical response  
30 occurred when continuously high doses of incobotulinumtoxinA were injected in the  
31 following years.<sup>18</sup> Clinical response was also observed in the majority of our patients after  
32 switching to incobotulinumtoxinA.<sup>13</sup>  
33  
34  
35  
36  
37  
38  
39

40 The present paper does not only show that NABTs did not increase by incobotulinumtoxinA  
41 treatment but we also present evidence that the decline in NABTs was not significantly  
42 different in patients who were continuously treated with incobotulinumtoxinA following  
43 partial therapy failure with other BoNT preparations compared to patients who no longer  
44 received BoNT treatment after neutralising antibody titres were detected.  
45  
46  
47  
48  
49  
50  
51

52  
53 The present study has a potential impact on patient management. If it is confirmed in  
54 additional studies that the antigenicity of incobotulinumtoxinA is as extremely low as  
55 suggested here – it has to be kept in mind that the presented data were produced in an  
56  
57  
58  
59  
60

1  
2  
3 uncontrolled, non-randomised study from a single centre— injection intervals and dosages can  
4  
5 possibly be modified to meet patients' need for an optimised individual treatment.  
6  
7

8  
9  
10 **Acknowledgments** Neutralising antibody assays were carried out by Toxogen GmbH,  
11  
12 Hannover, Germany. Editorial assistance was provided by Elke Grosselindemann (Brett  
13  
14 Medical Writing Australia).  
15

16  
17  
18 **Funding** All costs associated with the publishing of the present manuscript were met by Merz  
19  
20 Pharmaceuticals GmbH, Frankfurt, Germany. Merz Pharmaceuticals also paid for the  
21  
22 neutralising antibody assays. Merz Pharmaceuticals was not involved in study design, data  
23  
24 collection, and data analysis and interpretation. The authors were independent from the  
25  
26 funder; they had full access to all presented data and take responsibility for all data and  
27  
28 analyses.  
29  
30

31  
32  
33  
34 **Competing interest** HH: participated in research studies for which unrestricted grants were  
35  
36 provided by Allergan, Merz and Ipsen. He has been the recipient of honoraria and fees for  
37  
38 presentations at meetings and conferences and for participating in Advisory Boards from  
39  
40 Allergan, Ipsen and Merz; MM and UK: received honoraria and fees for presentations at  
41  
42 meetings and conferences; CH: nothing to declare; HB: is shareholder and CEO of Toxogen  
43  
44 GmbH, a spin-off of Medical School Hannover.  
45  
46

47  
48  
49 **Patient consent** Obtained.  
50

51  
52 **Ethics approval** The local ethics committee was asked and agreed on the continuation of  
53  
54 botulinumtoxin treatment with the new preparation, incobotulinumtoxinA, as a possible  
55  
56 treatment option. Usually the recommendation for secondary non-responders is to stop  
57  
58 botulinumtoxin treatment.  
59  
60

1  
2  
3 **Data sharing** There are no additional study data.  
4

5 **Contributors** Study design, data collection, analysis and interpretation were carried out by all  
6  
7 authors. HH prepared the first draft of the manuscript; all authors participated in the final  
8  
9 preparation of the manuscript and approved the final version.  
10  
11  
12  
13  
14  
15  
16  
17  
18  
19  
20  
21  
22  
23  
24  
25  
26  
27  
28  
29  
30  
31  
32  
33  
34  
35  
36  
37  
38  
39  
40  
41  
42  
43  
44  
45  
46  
47  
48  
49  
50  
51  
52  
53  
54  
55  
56  
57  
58  
59  
60

For peer review only

## REFERENCES

1. Jankovic J. Botulinum toxin in clinical practice. *J Neurol Neurosurg Psychiatry* 2004;75:951–7.
2. Simpson DM, Blitzer A, Brashear A, *et al.* Assessment: botulinum neurotoxin for the treatment of movement disorders (an evidence-based review). Report of the Therapeutics and Technology Assessment Subcommittee of the American Academy of Neurology. *Neurology* 2008;70:1699–706.
3. Frevert J. Content of botulinum neurotoxin in botox(r)/vistabel(r), disport(r)/azzalure(r), and xeomin(r)/bocouture(r). *Drugs R D* 2010;10:67–73.
4. Naumann M, Carruthers A, Carruthers J, *et al.* Meta-analysis of neutralizing antibody conversion with onabotulinumtoxinA (BOTOX®) across multiple indications. *Mov Disord* 2010;25:2211–8.
5. Dressler D. Botulinum toxin drugs: future developments. *J Neural Transm* 2008;115:575–7.
6. Brin MF, Comella CL, Jankovic J, *et al.* Long-term treatment with botulinum toxin type A in cervical dystonia has low immunogenicity by mouse protection assay. *Mov Disord* 2008;23:1353–60.
7. Fargel M, Psaila E. Results of a multi-national patient and physician survey on treatment satisfaction with current botulinum toxin treatment in focal dystonia. *Mov Disord* 2010; 25(Suppl.2):S511 (abstract 980).
8. Benecke R, Jost WH, Kanovsky P, *et al.* A new botulinum toxin type A free of complexing proteins for treatment of cervical dystonia. *Neurology* 2005;64:1949–51.
9. Comella CL, Jankovic J, Truong DD, *et al.* Efficacy and safety of incobotulinumtoxinA (NT 201, XEOMIN®), botulinum neurotoxin type A, without accessory proteins) in patients with cervical dystonia. *J Neurol Sci* 2011;308:103-9.

- 1  
2  
3 10. Hanschmann A, Grafe S. Safety and efficacy of repeated NT 201 (botulinum  
4  
5 neurotoxin type A free from complexing proteins) injections of patients with cervical  
6  
7 dystonia: a first long-term safety analysis. *Mov Disord* 2010;25(Suppl.2):S237  
8  
9 (abstract 153).
- 10  
11 11. Jost WH, Blümel J, Grafe S. Botulinum neurotoxin type A free of complexing proteins  
12  
13 (Xeomin®) in focal dystonia. *Drugs* 2007;67:669–83.
- 14  
15 12. Frevert J, Dressler D. Complexing proteins in botulinum toxin type A drugs: a help or  
16  
17 a hindrance? *Biologics* 2010;4:325–32.
- 18  
19 13. Hefter H, Kahlen U, Moll M, *et al.* Follow-up of neutralizing antibody titers after  
20  
21 continuous treatment with a BoNT/A preparation free from complexing proteins in  
22  
23 patients with dystonia and secondary non-response to other BoNT/A preparations. *J*  
24  
25 *Neurol Sci* 2009;285(S1): S299.
- 26  
27 14. Tsui JK, Eisen A, Stoessl AJ, *et al.* Double-blind study of botulinum toxin in  
28  
29 spasmodic torticollis. *Lancet* 1986;2:245–7.
- 30  
31 15. Göschel H, Wohlfarth K, Frevert J, *et al.* Botulinum A toxin therapy: neutralizing and  
32  
33 nonneutralizing antibodies – therapeutic consequences. *Exp Neurol* 1997;147:96–102.
- 34  
35 16. Dressler D, Bigalke H. Botulinum toxin antibody type A titres after cessation of  
36  
37 botulinum toxin therapy. *Mov Disord* 2002;17:170–3.
- 38  
39 17. Dressler D. Botulinum toxin for treatment of dystonia. *Eur J Neurol*  
40  
41 2010;17(Suppl.1):88–96.
- 42  
43 18. Adib Saberi F, Bigalke H, Dressler D. Antigenicity differences between two brands of  
44  
45 botulinum toxin A. *Mov Disord* 2010; 25(Suppl.2):S227 (abstract 125).
- 46  
47  
48  
49  
50  
51  
52  
53  
54  
55  
56  
57  
58  
59  
60



### Figure legends

**Figure 1** Decline in neutralising antibody titres in 37 partial secondary non-responders (group 3) with cervical dystonia who were switched from their previous botulinum neurotoxin type A therapy to incobotulinumtoxinA treatment following the detection of neutralising antibodies. (coloured symbols ●, ▲, ×, ■, ◆) patients receiving incobotulinumtoxinA; (■, bold line) data from one patient with cessation of botulinum toxin therapy were included as visual marker for comparison with Figure 2. NABT, neutralising antibody titre

**Figure 2** Decline in neutralising antibody titres in 24 patients with cervical dystonia after cessation of botulinum neurotoxin type A therapy following the detection of neutralising antibodies. (■) patients described in Dressler *et al.*<sup>16</sup>, group 2 with complete therapy failure; (coloured ●) follow-up patients from our centre, group 1 with partial therapy failure; data of one patient (■, bold line) were highlighted for comparison with Figure 1. Please note that titre changes can only be presented for the time span when titres were within the detection limits of the mouse hemidiaphragm assay. NABT, neutralising antibody titre

1  
2  
3  
4  
5  
6  
7  
8  
9  
10  
11  
12  
13  
14  
15  
16  
17  
18  
19  
20  
21  
22  
23  
24  
25  
26  
27  
28  
29  
30  
31  
32  
33  
34  
35  
36  
37  
38  
39  
40  
41  
42  
43  
44  
45  
46  
47

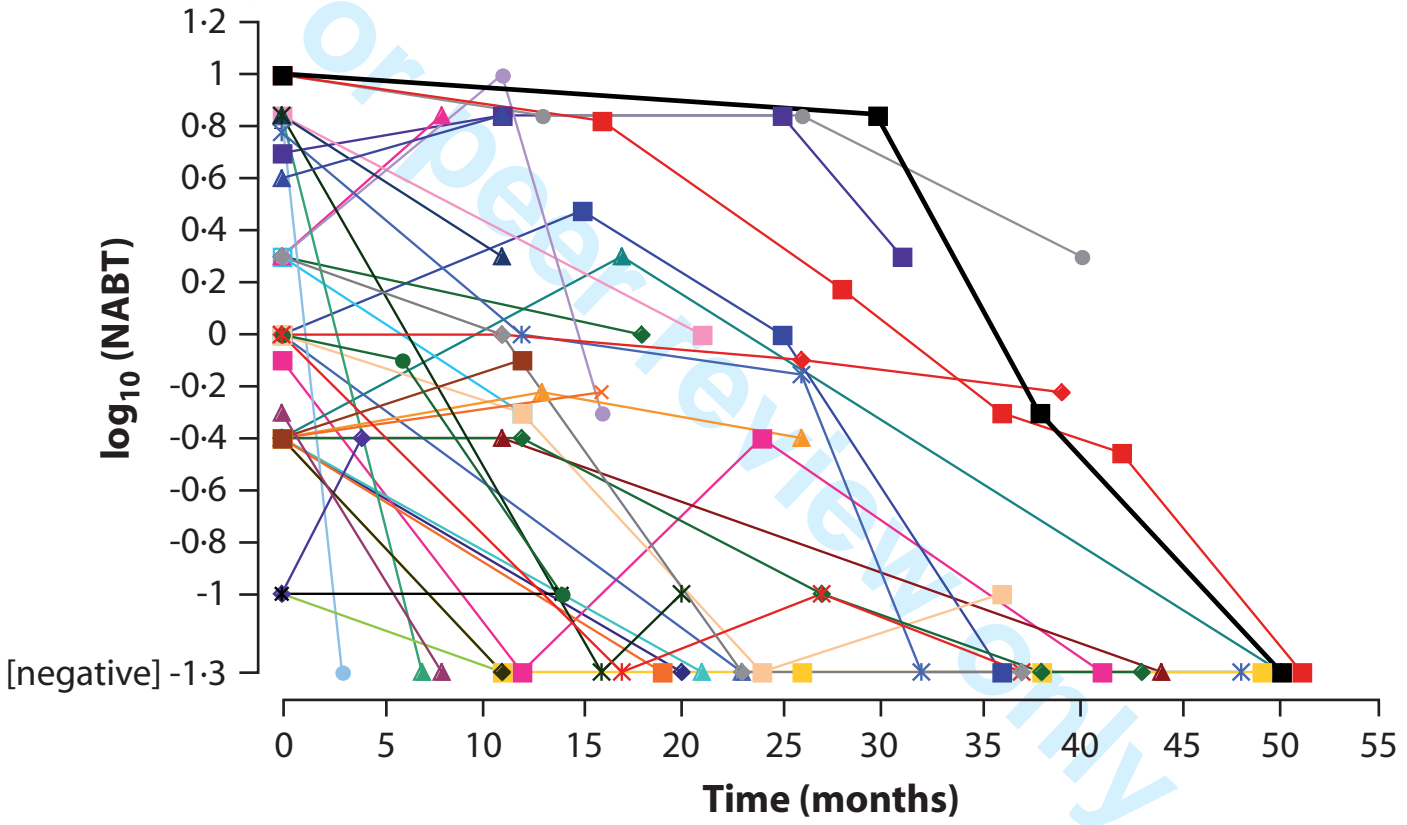

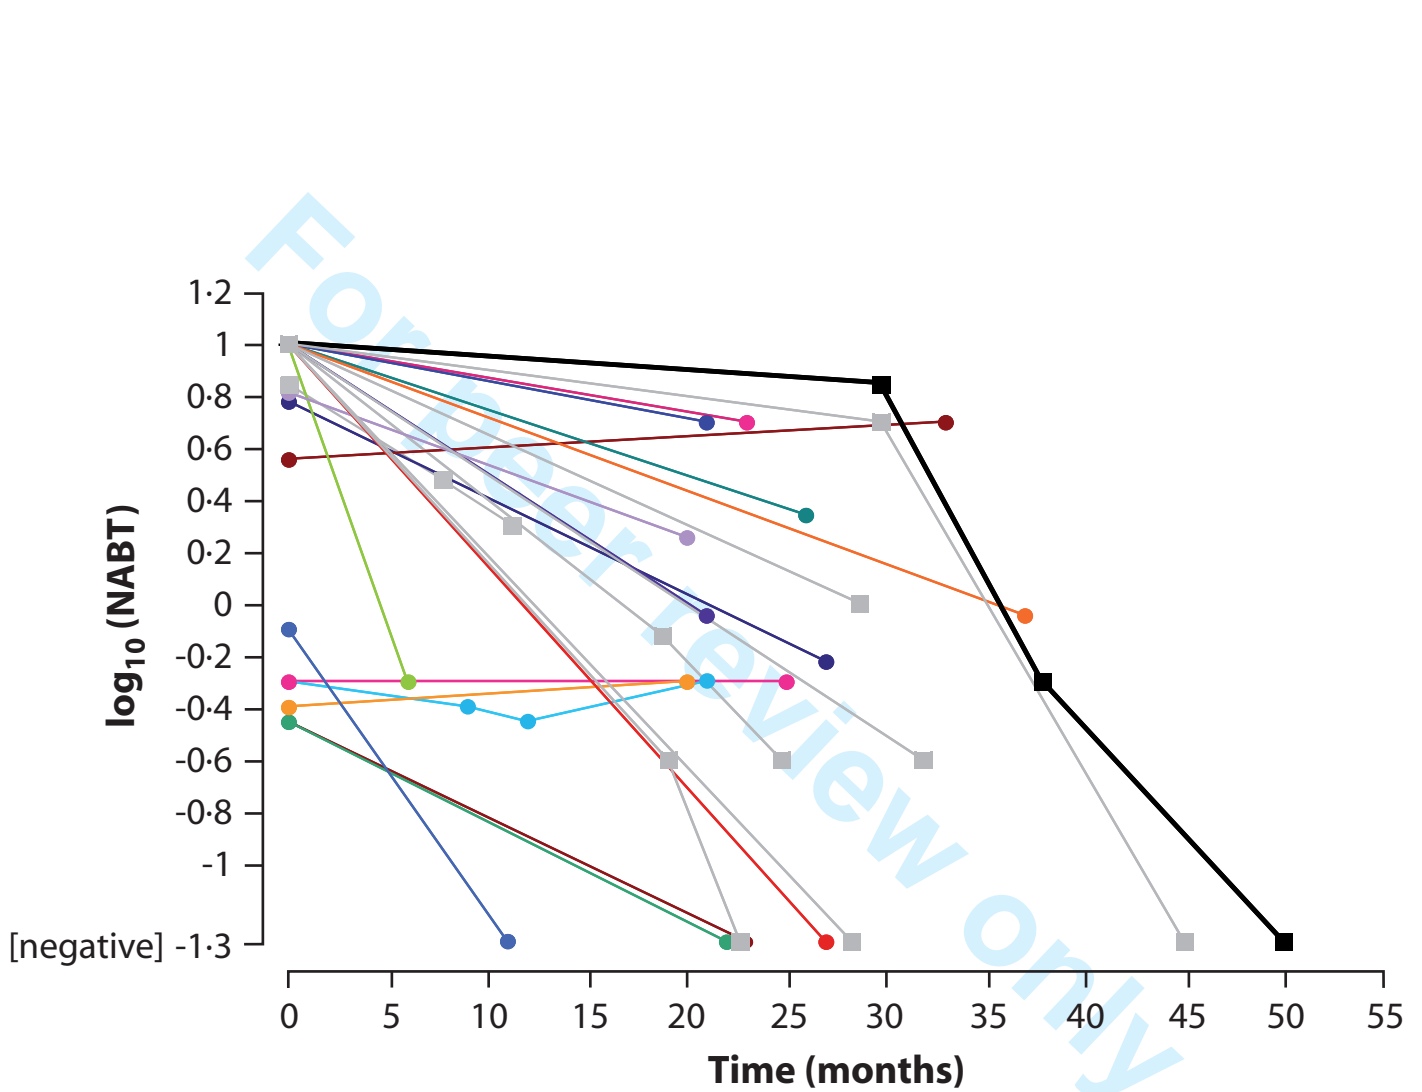

1  
2  
3 **Prospective analysis of neutralising antibody titres in secondary non-responders**  
4 **under continuous treatment with a botulinumtoxin type A preparation free of**  
5 **complexing proteins – a single cohort 4-year follow-up study**  
6  
7  
8  
9

10  
11 Harald Hefter<sup>1</sup>, Christian Hartmann<sup>1</sup>, Ulrike Kahlen<sup>1</sup>, Marek Moll<sup>1</sup>, Hans Bigalke<sup>2</sup>

12  
13  
14 <sup>1</sup> Department of Neurology, University of Düsseldorf, Moorenstrasse 5, Düsseldorf, Germany

15  
16 <sup>2</sup> Institute of Toxicology, Medical School Hannover, Hannover, Germany  
17  
18  
19

20 Corresponding author

21  
22 Harald Hefter

23  
24 Department of Neurology, University of Düsseldorf

25  
26 Moorenstrasse 5, D-40225 Düsseldorf, Germany

27  
28 Email: harald.hefter@online.de

29  
30  
31 Tel: +49 211 811 7025

32  
33  
34 Fax: +49 211 811 4903  
35  
36  
37

38 I Harald Hefter the Corresponding Author of this article contained within the original  
39 manuscript which includes any diagrams & photographs, other illustrative material, video,  
40 film or any other material howsoever submitted by the Contributor(s) at any time and related  
41 to the Contribution (“the Contribution”) have the right to grant on behalf of all authors and do  
42 grant on behalf of all authors, a licence to the BMJ Publishing Group Ltd and its licensees, to  
43 permit this Contribution (if accepted) to be published in BMJ Open and any other BMJ Group  
44 products and to exploit all subsidiary rights, as set out in the licence at:  
45  
46  
47  
48  
49  
50  
51

52 ([http://group.bmj.com/products/journals/instructions-for-authors/BMJOpen\\_licence.pdf](http://group.bmj.com/products/journals/instructions-for-authors/BMJOpen_licence.pdf))  
53  
54  
55  
56  
57  
58  
59  
60

1  
2  
3 **Word count (text):** 1807  
4

5 **Word count (abstract):** 296  
6

7 **Tables/Figures:** 0/2  
8

9 **References:** 18  
10

11 **Short title:** Low antigenicity of incobotulinumtoxinA  
12  
13  
14  
15  
16  
17  
18  
19  
20  
21  
22  
23  
24  
25  
26  
27  
28  
29  
30  
31  
32  
33  
34  
35  
36  
37  
38  
39  
40  
41  
42  
43  
44  
45  
46  
47  
48  
49  
50  
51  
52  
53  
54  
55  
56  
57  
58  
59  
60

For peer review only

**ABSTRACT**

**Objective.** In long-term botulinum neurotoxin treatment, loss of therapeutic efficacy may occur due to neutralising antibody formation. Preliminary results with incobotulinumtoxinA, a preparation free of complexing / accessory proteins, have indicated a low antigenicity. We hypothesised that continuous treatment with this botulinum neurotoxin preparation would not result in an increase in neutralising antibody titres (NABTs) in patients with preexisting NABTs.

**Design.** Prospective, blinded cohort study.

**Setting.** Single centre in Germany.

**Participants.** Thirty-seven cervical dystonia patients with NABTs and partial secondary non-responsiveness to their previous botulinum neurotoxin type A treatment.

**Intervention.** 3-monthly intramuscular injections of incobotulinumtoxinA with a constant dose of 200 MU per injection during the first year; thereafter up to 500 MU for the next 36 months.

**Outcome measures.** Primary outcome measure: number of patients in whom NABTs declined below the initial titre after 48 months of incobotulinumtoxinA treatment or in whom titres had become negative within the 48 months. Secondary outcome measure: steepness of changes in NABT. NABTs were determined by mouse hemidiaphragm assay. Findings were compared to long-term data from 24 cervical dystonia patients who had developed NABTs and in whom treatment had been discontinued.

**Results.** Following a transient increase in the first 24 months under incobotulinumtoxinA treatment in some patients, NABTs declined well below the initial titre in the majority of patients. Test assay results were negative in most of the patients followed for more than 36 months. NABTs seemed to decline into the negative detection range as rapidly under incobotulinumtoxinA treatment as after cessation of botulinum neurotoxin therapy.

1  
2  
3 **Conclusions.** The reduction of neutralising antibody titres despite continuous treatment with  
4 incobotulinumtoxinA indicates low antigenicity of incobotulinumtoxinA. This might have  
5 implications on restrictions such as minimum injection intervals of  $\geq 10$  weeks currently in  
6 place for maintaining successful long-term application of botulinum neurotoxin.  
7  
8  
9  
10

11  
12  
13  
14 **Key words:** secondary non-responder - cervical dystonia - cessation of therapy - neutralising  
15 antibody titre - complexing proteins – botulinum neurotoxin  
16  
17  
18  
19  
20  
21  
22  
23  
24  
25  
26  
27  
28  
29  
30  
31  
32  
33  
34  
35  
36  
37  
38  
39  
40  
41  
42  
43  
44  
45  
46  
47  
48  
49  
50  
51  
52  
53  
54  
55  
56  
57  
58  
59  
60

## ARTICLE SUMMARY

### Article focus

- Evaluation of antigenicity of incobotulinumtoxinA, a botulinum neurotoxin type A preparation free of complexing proteins for the treatment of cervical dystonia.

### Key messages

- Secondary non-responders to conventional type A preparations showed a decline in neutralising antibody titres despite continuous treatment with incobotulinumtoxinA over a period of up to 50 months.
- Neutralising antibody titres seemed to decline into the negative detection range as rapidly under incobotulinumtoxinA treatment as after cessation of botulinumtoxin therapy.
- These results indicate low antigenicity of incobotulinumtoxinA.

### Strengths and limitations of this study

- Up to date this study is the largest investigation of secondary non-responders with neutralising antibodies against botulinumtoxinA.
- The continuous treatment with incobotulinumtoxinA in secondary non-responders according to current knowledge of immunogenicity of botulinumtoxins should have resulted in boosting of antibody titres. Instead an unexpected decline of antibody titres was observed.
- This is an interesting finding despite the small sample size (n=37). Monocentric data have to be confirmed in multicentre studies.



## INTRODUCTION

Intramuscular injections of botulinum neurotoxin (BoNT) have become the treatment of choice for the symptomatic treatment of focal dystonias;<sup>1</sup> a recent evidence-based assessment gave a Level A recommendation for the treatment of cervical dystonia (CD).<sup>2</sup> Therapeutic BoNT type A (BoNT/A) preparations usually consist of a high molecular weight complex containing the biologically active 150 kDa neurotoxin, non-toxic complexing / accessory proteins, and excipients.<sup>3</sup> Repeated BoNT injections can trigger an immune response and can result in the formation of neutralising antibodies against the botulinum neurotoxin which might lead to non-responsiveness to treatment.<sup>4</sup> To minimise this loss of therapeutic effect, it is recommended to avoid risk factors such as booster injections, the use of high doses, and short intervals of less than 10 to 12 weeks between injections.<sup>5</sup> Thus, optimal BoNT injection management leads to therapy restrictions in order to avoid secondary non-response.

Current treatment recommendations reduce the frequency of secondary non-response to approx. 2% over a treatment period of 2 years in patients with cervical dystonia.<sup>6</sup> However, a considerable percentage of patients would prefer shorter injection intervals and more individualised treatment.<sup>7</sup> There is thus still a need for a BoNT preparation with an extremely low antigenicity to avoid therapy restrictions and meet patients' needs. The new BoNT/A preparation free of complexing proteins seems to be such a candidate.

IncobotulinumtoxinA (Xeomin®, NT 201, Merz Pharmaceuticals GmbH, Germany) treatment has not only been proven efficacious and well tolerated in patients with CD<sup>8-10</sup> but preliminary results also indicate a low antigenicity.<sup>3,11-13</sup> The present study was designed to support these hints of low antigenicity. We hypothesised that continuous treatment with incobotulinumtoxinA would not result in an increase in neutralising antibody titres (NABTs) in patients with preexisting NABTs. To [provetest](#) our hypothesis, we prospectively analysed NABTs in an immunologically critical subgroup of patients with NABTs and partial

1  
2  
3 secondary non-responsiveness who were switched from long-term treatment with other  
4  
5 botulinumtoxin A preparations to incobotulinumtoxinA treatment.  
6  
7

## 8 9 **METHODS**

10  
11 Thirty-seven adult patients suffering from idiopathic cervical dystonia (CD) partly in  
12  
13 combination with other focal or generalised dystonia had been satisfactorily treated long-term  
14  
15 with the BoNT/A preparations abobotulinumtoxinA (Dysport®, Ipsen Ltd., Slough, UK) or  
16  
17 onabotulinumtoxinA (Botox®, Allergan Inc, Irvine, USA). They were included in this  
18  
19 prospective, blinded, monocentric study 1. when clinically secondary non-responsiveness  
20  
21 with systematic worsening of the severity of cervical dystonia occurred –severity was  
22  
23 measured by means of the objective TSUI score<sup>14</sup> (12 weeks after injection) at three  
24  
25 consecutive injection visits over a period of at least 6 months despite increased BoNT/A  
26  
27 doses– and 2. when patients had given their informed consent to be switched to  
28  
29 incobotulinumtoxinA.  
30  
31  
32

33  
34 IncobotulinumtoxinA was administered as intramuscular injections of 200 MU without  
35  
36 electromyography guidance every 3 months according to their previous BoNT/A injection  
37  
38 protocols. IncobotulinumtoxinA doses were kept constant during the first year; thereafter,  
39  
40 doses could be adjusted according to the patients' requirements, reduced or increased up to  
41  
42 500 MU per injection.  
43  
44

45  
46 The study was carried out according to the Declaration of Helsinki and Good Clinical  
47  
48 Practice.

49  
50 Blood samples for BoNT antibody testing were collected at the start of the study and in yearly  
51  
52 intervals. Antibody titres were determined by an independent blinded contractor (Toxogen  
53  
54 GmbH, Hannover, Germany) using the sensitive mouse hemidiaphragm assay for neutralising  
55  
56 antibodies.<sup>15</sup> Base10 logarithms are presented for all titres ( $\log_{10}$  (NABT) [mU/ml]); the value  
57  
58 of -1.3 was assigned to a negative test result. The upper limit of neutralising antibody  
59  
60

1  
2  
3 detection in the mouse hemidiaphragm assay was 10 mU/mL ( $\log_{10}(10) = 1$ ), the lower limit  
4 was 0.1 mU/ml ( $(\log_{10}(0.1) = -1)$ ). The use of the logarithmic scale allows the comparison of  
5 NABTs over the broad range of titres between 10 mU/ml and 0.1 mU/ml.  
6  
7

8  
9 The primary outcome measure of the study was the number of patients in whom NABTs  
10 declined below the initial titre after 48 months of incobotulinumtoxinA treatment or who had  
11 negative titre results within the 48 months. The steepness of changes in NABT was chosen as  
12 secondary outcome measure. This parameter turned out to be difficult to calculate, because  
13 the titre had dropped below the detection limit in too many patients.  
14  
15  
16  
17  
18  
19

20  
21  
22 To test our hypothesis, the formation of neutralising antibodies in the present patient  
23 population was followed over a period of up to 50 months.  
24  
25

26  
27 The temporal course of neutralising antibody titres (NABTs) was compared to the course of  
28 NABTs of 24 CD patients who had their BoNT treatment discontinued after development of  
29 antibody-induced treatment failure. NABTs of eight of these 24 patients have been described  
30 in the literature,<sup>16</sup> the remaining 16 are follow-up patients from our centre.  
31  
32  
33  
34  
35  
36

37  
38 For quantification of the slope of NABT decline, patient data were divided into three groups.  
39 Group 1 included the titres of the 16 patients observed in our department with partial therapy  
40 failure who had their BoNT treatment discontinued. Group 2 were the NABTs of the 8  
41 patients with complete therapy failure reported in the literature<sup>16</sup> and group 3 included the  
42 titres of 37 patients with partial therapy failure who received continuous incobotulinumtoxinA  
43 treatment after positive NABTs were detected. The decline in NABTs was quantified by  
44 calculating a linear regression line through  $\log_{10}$ AB-titre values against time  
45 ( $\log_{10}(\text{mU/ml/year})$ ) for each patient. A negative titre was substituted by  $\log_{10}(0.01)$ , because  
46 0.01 is the next titre value below the detection limit of 0.01 mU/ml.  
47  
48  
49  
50  
51  
52  
53  
54  
55  
56  
57  
58  
59  
60

1  
2  
3 For group comparisons, an ANOVA was performed (Kruskal-Wallis test), for group mean  
4  
5 comparisons the non-parametric Mann-Whitney U test was used. These tests are part of the  
6  
7 commercially available statistics package SPSS.  
8  
9

## 10 11 **RESULTS**

12  
13  
14 The two figures show the temporal course of neutralising antibody titres over a period of up to  
15  
16 50 months in secondary non-responders who were either switched to incobotulinumtoxinA  
17  
18 (Figure 1), or did not receive any further BoNT treatment (Figure 2).  
19

20  
21 Antibody titre values of one of the CD patients with cessation of BoNT treatment (Figure 2)  
22  
23 were included for a visual marker in Figure 1 (symbol: black square, bold line). This patient  
24  
25 had high titres (upper limit of detection); after a slow decline over the first 30 months, the  
26  
27 neutralising antibody test was negative at the end of the 50-month observation period.  
28

29  
30 Despite a transient increase in 10 patients in the first 24 months under incobotulinumtoxinA  
31  
32 treatment (Figure 1), neutralising antibody titres declined well below the initial titre in the  
33  
34 majority of patients (31 patients, 84%,  $p < 0.001$ , chi-square test). Test assay results were even  
35  
36 negative or below the lower detection limit in 23 (62%) of the patients in the follow-up, i.e.  
37  
38 antibody titres were  $\leq 0.1$  mU/ml. In Figure 2 decline of titres is demonstrated for the patients  
39  
40 in whom therapy was stopped (light grey squares = published patients, coloured circles own  
41  
42 patients).  
43

44  
45 There was considerable inter-individual variability in the steepness of the titre decline in all  
46  
47 three patient populations (Figure 1 and 2). In most patients receiving incobotulinumtoxinA  
48  
49 treatment (Figure 1), baseline titres were lower than in the patients with discontinued  
50  
51 treatment (Figure 2). Under incobotulinumtoxinA treatment, antibody titres seemed to decline  
52  
53 into the negative detection range as rapidly as after cessation of therapy and in some cases  
54  
55 became negative even earlier than in those patients who had discontinued their BoNT/A  
56  
57 treatment, probably because of lower initial titres.  
58  
59  
60

1  
2  
3 Mean slope of NABT decline ( $-0.0516 \log_{10}(\text{mU/ml})/\text{year}$ ) was lowest in the patients with  
4 partial therapy failure in whom BoNT treatment was discontinued after detection of positive  
5 NABTs (group 1). Variability of slopes was also highest in this group (min:  $-0.2168$ ; max:  
6  $0.0048$ ; SD:  $0.6463$ ). The NABTs reported in the literature for patients with complete  
7 treatment failure (group 2) declined rather homogeneously ( $-0.0664$ ; min:  $-1.1620$ ; max:  $-$   
8  $0.0348$ ; SD:  $0.2897$ ). However, the mean slope for group 2 did not differ significantly from  
9 the mean slope for group 1 ( $p=0.12$ ). The steepest mean slope of NABT decline ( $-0.0750$ ) was  
10 observed in group 3 (min:  $-0.9484$ ; max:  $0.1505$ ; SD:  $0.1725$ ).

11  
12 The Kruskal-Wallis test did not show any significant differences of slopes of NABT decline  
13 between the groups ( $p=0.269$ ). Even when groups 1 and 2 were combined and slopes of  
14 patients with and without incobotulinumtoxinA treatment (group 3 vs. groups 1+2) were  
15 compared, no significant difference could be detected ( $p=0.816$ ).

## 33 DISCUSSION

34  
35 IncobotulinumtoxinA is a preparation free of complexing proteins with a high specific  
36 biological activity.<sup>3,17</sup>

37  
38 The patients included in our investigation had already developed secondary treatment failure  
39 and neutralising antibodies under the former treatment with botulinum toxin type A  
40 formulations containing complexing proteins. Despite their sensitivity to react to BoNT/A  
41 treatment with antibody formation and despite a possible increase of doses up to 500 MU  
42 incobotulinumtoxinA, more than 80% of these patients showed a decrease in antibody titres  
43 and in more than 60% a reduction down to the detection limit was observed. The antigen load  
44 of repetitive injections with 200 to 500 MU incobotulinumtoxinA every 3 months was  
45 apparently so low that in this cohort of immunologically critical patients no permanent  
46 boosting of antibody titres was observed. This confirms our hypothesis. We do not know  
47  
48  
49  
50  
51  
52  
53  
54  
55  
56  
57  
58  
59  
60

1  
2  
3 whether this occurs because the protein load of 0.88 ng to 2.2 ng (200 to 500 MU) of active  
4 neurotoxin is not detected by the human immune system after intramuscular injections or  
5 because of the lack of complexing proteins. The role of complexing proteins regarding the  
6 efficacy of treatment in secondary non-responders with BoNT/A is still unclear but deserves  
7 further interest.  
8  
9

10  
11 Since NABTs under incobotulinumtoxinA treatment declined at least as rapidly as after  
12 cessation of therapy, we recommend to detect antibody-induced therapy failure as early as  
13 possible to avoid any further increase in NABTs and development of complete treatment  
14 failure. Comparison of Figures 1 and 2 indicates the tendency that in patients with partial  
15 therapy failure (group 1 and 3) titres return to negative values earlier than in patients with  
16 complete therapy failure and higher antibody titres (group 2).  
17  
18  
19

20  
21 This is important for further continuation of BoNT/A treatment. It has been observed that in a  
22 patient with antibody-induced therapy failure and negative antibody titres after cessation of  
23 therapy after several years, no new formation of neutralising antibodies and clinical response  
24 occurred when continuously high doses of incobotulinumtoxinA were injected in the  
25 following years.<sup>18</sup> Clinical response was also observed in the majority of our patients after  
26 switching to incobotulinumtoxinA.<sup>13</sup>  
27  
28  
29

30  
31 The present paper does not only show that NABTs did not increase by incobotulinumtoxinA  
32 treatment but we also present evidence that the decline in NABTs was not significantly  
33 different in patients who were continuously treated with incobotulinumtoxinA following  
34 partial therapy failure with other BoNT preparations compared to patients who no longer  
35 received BoNT treatment after neutralising antibody titres were detected.  
36  
37  
38  
39

40  
41  
42  
43  
44  
45  
46  
47  
48  
49  
50  
51  
52  
53  
54  
55  
56  
57  
58  
59  
60  
61  
62  
63  
64  
65  
66  
67  
68  
69  
70  
71  
72  
73  
74  
75  
76  
77  
78  
79  
80  
81  
82  
83  
84  
85  
86  
87  
88  
89  
90  
91  
92  
93  
94  
95  
96  
97  
98  
99  
100  
101  
102  
103  
104  
105  
106  
107  
108  
109  
110  
111  
112  
113  
114  
115  
116  
117  
118  
119  
120  
121  
122  
123  
124  
125  
126  
127  
128  
129  
130  
131  
132  
133  
134  
135  
136  
137  
138  
139  
140  
141  
142  
143  
144  
145  
146  
147  
148  
149  
150  
151  
152  
153  
154  
155  
156  
157  
158  
159  
160  
161  
162  
163  
164  
165  
166  
167  
168  
169  
170  
171  
172  
173  
174  
175  
176  
177  
178  
179  
180  
181  
182  
183  
184  
185  
186  
187  
188  
189  
190  
191  
192  
193  
194  
195  
196  
197  
198  
199  
200  
201  
202  
203  
204  
205  
206  
207  
208  
209  
210  
211  
212  
213  
214  
215  
216  
217  
218  
219  
220  
221  
222  
223  
224  
225  
226  
227  
228  
229  
230  
231  
232  
233  
234  
235  
236  
237  
238  
239  
240  
241  
242  
243  
244  
245  
246  
247  
248  
249  
250  
251  
252  
253  
254  
255  
256  
257  
258  
259  
260  
261  
262  
263  
264  
265  
266  
267  
268  
269  
270  
271  
272  
273  
274  
275  
276  
277  
278  
279  
280  
281  
282  
283  
284  
285  
286  
287  
288  
289  
290  
291  
292  
293  
294  
295  
296  
297  
298  
299  
300  
301  
302  
303  
304  
305  
306  
307  
308  
309  
310  
311  
312  
313  
314  
315  
316  
317  
318  
319  
320  
321  
322  
323  
324  
325  
326  
327  
328  
329  
330  
331  
332  
333  
334  
335  
336  
337  
338  
339  
340  
341  
342  
343  
344  
345  
346  
347  
348  
349  
350  
351  
352  
353  
354  
355  
356  
357  
358  
359  
360  
361  
362  
363  
364  
365  
366  
367  
368  
369  
370  
371  
372  
373  
374  
375  
376  
377  
378  
379  
380  
381  
382  
383  
384  
385  
386  
387  
388  
389  
390  
391  
392  
393  
394  
395  
396  
397  
398  
399  
400  
401  
402  
403  
404  
405  
406  
407  
408  
409  
410  
411  
412  
413  
414  
415  
416  
417  
418  
419  
420  
421  
422  
423  
424  
425  
426  
427  
428  
429  
430  
431  
432  
433  
434  
435  
436  
437  
438  
439  
440  
441  
442  
443  
444  
445  
446  
447  
448  
449  
450  
451  
452  
453  
454  
455  
456  
457  
458  
459  
460  
461  
462  
463  
464  
465  
466  
467  
468  
469  
470  
471  
472  
473  
474  
475  
476  
477  
478  
479  
480  
481  
482  
483  
484  
485  
486  
487  
488  
489  
490  
491  
492  
493  
494  
495  
496  
497  
498  
499  
500  
501  
502  
503  
504  
505  
506  
507  
508  
509  
510  
511  
512  
513  
514  
515  
516  
517  
518  
519  
520  
521  
522  
523  
524  
525  
526  
527  
528  
529  
530  
531  
532  
533  
534  
535  
536  
537  
538  
539  
540  
541  
542  
543  
544  
545  
546  
547  
548  
549  
550  
551  
552  
553  
554  
555  
556  
557  
558  
559  
560  
561  
562  
563  
564  
565  
566  
567  
568  
569  
570  
571  
572  
573  
574  
575  
576  
577  
578  
579  
580  
581  
582  
583  
584  
585  
586  
587  
588  
589  
590  
591  
592  
593  
594  
595  
596  
597  
598  
599  
600  
601  
602  
603  
604  
605  
606  
607  
608  
609  
610  
611  
612  
613  
614  
615  
616  
617  
618  
619  
620  
621  
622  
623  
624  
625  
626  
627  
628  
629  
630  
631  
632  
633  
634  
635  
636  
637  
638  
639  
640  
641  
642  
643  
644  
645  
646  
647  
648  
649  
650  
651  
652  
653  
654  
655  
656  
657  
658  
659  
660  
661  
662  
663  
664  
665  
666  
667  
668  
669  
670  
671  
672  
673  
674  
675  
676  
677  
678  
679  
680  
681  
682  
683  
684  
685  
686  
687  
688  
689  
690  
691  
692  
693  
694  
695  
696  
697  
698  
699  
700  
701  
702  
703  
704  
705  
706  
707  
708  
709  
710  
711  
712  
713  
714  
715  
716  
717  
718  
719  
720  
721  
722  
723  
724  
725  
726  
727  
728  
729  
730  
731  
732  
733  
734  
735  
736  
737  
738  
739  
740  
741  
742  
743  
744  
745  
746  
747  
748  
749  
750  
751  
752  
753  
754  
755  
756  
757  
758  
759  
760  
761  
762  
763  
764  
765  
766  
767  
768  
769  
770  
771  
772  
773  
774  
775  
776  
777  
778  
779  
780  
781  
782  
783  
784  
785  
786  
787  
788  
789  
790  
791  
792  
793  
794  
795  
796  
797  
798  
799  
800  
801  
802  
803  
804  
805  
806  
807  
808  
809  
810  
811  
812  
813  
814  
815  
816  
817  
818  
819  
820  
821  
822  
823  
824  
825  
826  
827  
828  
829  
830  
831  
832  
833  
834  
835  
836  
837  
838  
839  
840  
841  
842  
843  
844  
845  
846  
847  
848  
849  
850  
851  
852  
853  
854  
855  
856  
857  
858  
859  
860  
861  
862  
863  
864  
865  
866  
867  
868  
869  
870  
871  
872  
873  
874  
875  
876  
877  
878  
879  
880  
881  
882  
883  
884  
885  
886  
887  
888  
889  
890  
891  
892  
893  
894  
895  
896  
897  
898  
899  
900  
901  
902  
903  
904  
905  
906  
907  
908  
909  
910  
911  
912  
913  
914  
915  
916  
917  
918  
919  
920  
921  
922  
923  
924  
925  
926  
927  
928  
929  
930  
931  
932  
933  
934  
935  
936  
937  
938  
939  
940  
941  
942  
943  
944  
945  
946  
947  
948  
949  
950  
951  
952  
953  
954  
955  
956  
957  
958  
959  
960  
961  
962  
963  
964  
965  
966  
967  
968  
969  
970  
971  
972  
973  
974  
975  
976  
977  
978  
979  
980  
981  
982  
983  
984  
985  
986  
987  
988  
989  
990  
991  
992  
993  
994  
995  
996  
997  
998  
999  
1000

The present study has an [potential](#) impact on patient management. If it is confirmed in additional studies that the antigenicity of incobotulinumtoxinA is as extremely low as suggested here – it has to be kept in mind that the presented data were produced in an

1  
2  
3 uncontrolled, non-randomised study from a single centre— injection intervals and dosages can  
4  
5 possibly be modified to meet patients’ need for an optimised individual treatment.  
6  
7

8  
9 **Acknowledgments** Neutralising antibody assays were carried out by Toxogen GmbH,  
10  
11 Hannover, Germany. Editorial assistance was provided by Elke Grosselindemann (Brett  
12  
13 Medical Writing Australia).  
14

15  
16  
17 **Funding** All costs associated with the publishing of the present manuscript were met by Merz  
18  
19 Pharmaceuticals GmbH, Frankfurt, Germany. Merz Pharmaceuticals also paid for the  
20  
21 neutralising antibody assays. Merz Pharmaceuticals was not involved in study design, data  
22  
23 collection, and data analysis and interpretation. [The authors were independent from the](#)  
24  
25 [funder; they had full access to all presented data and take responsibility for all data and](#)  
26  
27 [analyses.](#)  
28  
29  
30  
31

32  
33 **Competing interest** HH: participated in research studies for which unrestricted grants were  
34  
35 provided by Allergan, Merz and Ipsen. He has been the recipient of honoraria and fees for  
36  
37 presentations at meetings and conferences and for participating in Advisory Boards from  
38  
39 Allergan, Ipsen and Merz; MM and UK: received honoraria and fees for presentations at  
40  
41 meetings and conferences; CH: nothing to declare; HB: is shareholder and CEO of Toxogen  
42  
43 GmbH, a spin-off of Medical School Hannover.  
44  
45  
46  
47  
48

49 **Patient consent** Obtained.

50  
51 **Ethics approval** The local ethics committee was asked and agreed on the continuation of  
52  
53 botulinumtoxin treatment with the new preparation, incobotulinumtoxinA, as a possible  
54  
55 treatment option. Usually the recommendation for secondary non-responders is to stop  
56  
57 botulinumtoxin treatment.  
58  
59  
60

1  
2  
3 **Data sharing** There are no additional study data.  
4

5 **Contributors** Study design, data collection, analysis and interpretation were carried out by all  
6  
7 authors. HH prepared the first draft of the manuscript; all authors participated in the final  
8  
9 preparation of the manuscript and approved the final version.  
10  
11  
12  
13  
14  
15  
16  
17  
18  
19  
20  
21  
22  
23  
24  
25  
26  
27  
28  
29  
30  
31  
32  
33  
34  
35  
36  
37  
38  
39  
40  
41  
42  
43  
44  
45  
46  
47  
48  
49  
50  
51  
52  
53  
54  
55  
56  
57  
58  
59  
60

For peer review only



## REFERENCES

1. Jankovic J. Botulinum toxin in clinical practice. *J Neurol Neurosurg Psychiatry* 2004;75:951–7.
2. Simpson DM, Blitzer A, Brashear A, *et al.* Assessment: botulinum neurotoxin for the treatment of movement disorders (an evidence-based review). Report of the Therapeutics and Technology Assessment Subcommittee of the American Academy of Neurology. *Neurology* 2008;70:1699–706.
3. Frevert J. Content of botulinum neurotoxin in botox(r)/vistabel(r), disport(r)/azzalure(r), and xeomin(r)/bocouture(r). *Drugs R D* 2010;10:67–73.
4. Naumann M, Carruthers A, Carruthers J, *et al.* Meta-analysis of neutralizing antibody conversion with onabotulinumtoxinA (BOTOX®) across multiple indications. *Mov Disord* 2010;25:2211–8.
5. Dressler D. Botulinum toxin drugs: future developments. *J Neural Transm* 2008;115:575–7.
6. Brin MF, Comella CL, Jankovic J, *et al.* Long-term treatment with botulinum toxin type A in cervical dystonia has low immunogenicity by mouse protection assay. *Mov Disord* 2008;23:1353–60.
7. Fargel M, Psaila E. Results of a multi-national patient and physician survey on treatment satisfaction with current botulinum toxin treatment in focal dystonia. *Mov Disord* 2010; 25(Suppl.2):S511 (abstract 980).
8. Benecke R, Jost WH, Kanovsky P, *et al.* A new botulinum toxin type A free of complexing proteins for treatment of cervical dystonia. *Neurology* 2005;64:1949–51.
9. Comella CL, Jankovic J, Truong DD, *et al.* Efficacy and safety of incobotulinumtoxinA (NT 201, XEOMIN®), botulinum neurotoxin type A, without accessory proteins) in patients with cervical dystonia. *J Neurol Sci* 2011;308:103-9.

- 1  
2  
3 10. Hanschmann A, Grafe S. Safety and efficacy of repeated NT 201 (botulinum  
4  
5 neurotoxin type A free from complexing proteins) injections of patients with cervical  
6  
7 dystonia: a first long-term safety analysis. *Mov Disord* 2010;25(Suppl.2):S237  
8  
9 (abstract 153).
- 10  
11 11. Jost WH, Blümel J, Grafe S. Botulinum neurotoxin type A free of complexing proteins  
12  
13 (Xeomin®) in focal dystonia. *Drugs* 2007;67:669–83.
- 14  
15 12. Frevert J, Dressler D. Complexing proteins in botulinum toxin type A drugs: a help or  
16  
17 a hindrance? *Biologics* 2010;4:325–32.
- 18  
19 13. Hefter H, Kahlen U, Moll M, *et al.* Follow-up of neutralizing antibody titers after  
20  
21 continuous treatment with a BoNT/A preparation free from complexing proteins in  
22  
23 patients with dystonia and secondary non-response to other BoNT/A preparations. *J*  
24  
25 *Neurol Sci* 2009;285(S1): S299.
- 26  
27 14. Tsui JK, Eisen A, Stoessl AJ, *et al.* Double-blind study of botulinum toxin in  
28  
29 spasmodic torticollis. *Lancet* 1986;2:245–7.
- 30  
31 15. Göschel H, Wohlfarth K, Frevert J, *et al.* Botulinum A toxin therapy: neutralizing and  
32  
33 nonneutralizing antibodies – therapeutic consequences. *Exp Neurol* 1997;147:96–102.
- 34  
35 16. Dressler D, Bigalke H. Botulinum toxin antibody type A titres after cessation of  
36  
37 botulinum toxin therapy. *Mov Disord* 2002;17:170–3.
- 38  
39 17. Dressler D. Botulinum toxin for treatment of dystonia. *Eur J Neurol*  
40  
41 2010;17(Suppl.1):88–96.
- 42  
43 18. Adib Saberi F, Bigalke H, Dressler D. Antigenicity differences between two brands of  
44  
45 botulinum toxin A. *Mov Disord* 2010; 25(Suppl.2):S227 (abstract 125).
- 46  
47  
48  
49  
50  
51  
52  
53  
54  
55  
56  
57  
58  
59  
60

### Figure legends

**Figure 1** Decline in neutralising antibody titres in 37 partial secondary non-responders (group 3) with cervical dystonia who were switched from their previous botulinum neurotoxin type A therapy to incobotulinumtoxinA treatment following the detection of neutralising antibodies. (coloured symbols ●, ▲, ×, ■, ◆) patients receiving incobotulinumtoxinA; (■, bold line) data from one patient with cessation of botulinum toxin therapy were included as visual marker for comparison with Figure 2. NABT, neutralising antibody titre

**Figure 2** Decline in neutralising antibody titres in 24 patients with cervical dystonia after cessation of botulinum neurotoxin type A therapy following the detection of neutralising antibodies. (■) patients described in Dressler *et al.*<sup>16</sup>, group 2 with complete therapy failure; (coloured ●) follow-up patients from our centre, group 1 with partial therapy failure; data of one patient (■, bold line) were highlighted for comparison with Figure 1. Please note that titre changes can only be presented for the time span when titres were within the detection limits of the mouse hemidiaphragm assay. NABT, neutralising antibody titre
